# Supplementary material for: Next-Generation Sequencing and Proteomics of Cerebrospinal Fluid From COVID-19 Patients With Neurological Manifestations
Source: Front Immunol. 2021 Dec 9;12:782731. doi: 10.3389/fimmu.2021.782731 (PMC8695435; doi:10.3389/fimmu.2021.782731)
Supplement: Supplementary file 7 [file DataSheet_1.csv]

	ID	Description	GeneRatio	BgRatio	pvalue	p.adjust	qvalue	geneID	Count
hsa04610	hsa04610	Complement and coagulation cascades	14/90	85/8105	3.06E-13	5.39E-11	4.90E-11	966/4179/5329/2147/2158/2161/462/718/3053/731/7035/729/725/1361	14
hsa05143	hsa05143	African trypanosomiasis	5/90	37/8105	4.97E-05	0.004375159	0.003977418	4878/8542/3250/335/3910	5
hsa05205	hsa05205	Proteoglycans in cancer	10/90	205/8105	8.44E-05	0.004953981	0.004503619	1956/2260/2885/5329/815/1277/1278/7430/4478/4060	10
hsa04974	hsa04974	Protein digestion and absorption	7/90	103/8105	0.00013735	0.006043421	0.005494019	1277/1290/1278/1289/1307/1310/1361	7
hsa04151	hsa04151	PI3K-Akt signaling pathway	12/90	354/8105	0.000504861	0.017771094	0.01615554	1956/5159/2260/4254/2261/2885/1277/1278/10971/7529/672/3910	12
hsa05230	hsa05230	Central carbon metabolism in cancer	5/90	70/8105	0.001035418	0.030372249	0.027611135	1956/5159/2260/2261/4916	5
hsa04810	hsa04810	Regulation of actin cytoskeleton	8/90	218/8105	0.002811906	0.07069935	0.064272136	1956/5159/2260/2261/2147/7430/1072/4478	8
hsa04360	hsa04360	Axon guidance	7/90	182/8105	0.003994618	0.085322293	0.077565721	2051/6405/90249/219699/815/1072/5365	7
hsa05215	hsa05215	Prostate cancer	5/90	97/8105	0.004363072	0.085322293	0.077565721	6692/1956/5159/2260/2885	5
hsa04514	hsa04514	Cell adhesion molecules	6/90	149/8105	0.006119218	0.107698235	0.097907487	5817/4099/9379/57863/23705/5818	6
hsa04520	hsa04520	Adherens junction	4/90	71/8105	0.007843543	0.125496688	0.114087899	1956/2260/4301/5818	4
hsa05214	hsa05214	Glioma	4/90	75/8105	0.00948895	0.139171267	0.126519333	1956/5159/2885/815	4
hsa01521	hsa01521	EGFR tyrosine kinase inhibitor resistance	4/90	79/8105	0.01134453	0.146532111	0.13321101	1956/5159/2261/2885	4
hsa00604	hsa00604	Glycosphingolipid biosynthesis - ganglio series	2/90	15/8105	0.011655963	0.146532111	0.13321101	2583/81849	2
hsa04014	hsa04014	Ras signaling pathway	7/90	232/8105	0.014369108	0.168597529	0.153270481	1956/5159/2260/4254/2261/2885/4301	7
hsa04510	hsa04510	Focal adhesion	6/90	201/8105	0.024023243	0.249899171	0.227181064	1956/5159/2885/1277/1278/3910	6
hsa04072	hsa04072	Phospholipase D signaling pathway	5/90	148/8105	0.024137988	0.249899171	0.227181064	1956/5159/4254/2885/2147	5
hsa05146	hsa05146	Amoebiasis	4/90	102/8105	0.02650106	0.259121471	0.235564974	1277/731/1278/3910	4
hsa04015	hsa04015	Rap1 signaling pathway	6/90	210/8105	0.028983268	0.265295123	0.241177385	1956/5159/2260/4254/2261/4301	6
hsa05160	hsa05160	Hepatitis C	5/90	157/8105	0.030147173	0.265295123	0.241177385	1956/2885/10971/7529/975	5
hsa04066	hsa04066	HIF-1 signaling pathway	4/90	109/8105	0.0327416	0.27440579	0.249459809	1956/4878/815/2023	4
hsa00601	hsa00601	Glycosphingolipid biosynthesis - lacto and neolacto series	2/90	27/8105	0.035758846	0.286070765	0.260064332	10402/8703	2
hsa04010	hsa04010	MAPK signaling pathway	7/90	294/8105	0.044480246	0.334528799	0.30411709	1956/5159/2260/4254/2261/2885/55799	7
hsa05218	hsa05218	Melanoma	3/90	72/8105	0.045617564	0.334528799	0.30411709	1956/5159/2260	3
hsa04020	hsa04020	Calcium signaling pathway	6/90	240/8105	0.050233881	0.352797084	0.320724622	1956/5159/2260/2261/4916/815	6
hsa05133	hsa05133	Pertussis	3/90	76/8105	0.052117751	0.352797084	0.320724622	718/725/1072	3
hsa04926	hsa04926	Relaxin signaling pathway	4/90	129/8105	0.054959012	0.353378838	0.321253489	1956/2885/1277/1278	4
hsa05206	hsa05206	MicroRNAs in cancer	7/90	310/8105	0.056219361	0.353378838	0.321253489	1956/5159/2261/2885/7431/7430/672	7
hsa04012	hsa04012	ErbB signaling pathway	3/90	85/8105	0.06827259	0.403541908	0.36685628	1956/2885/815	3
hsa04512	hsa04512	ECM-receptor interaction	3/90	88/8105	0.074108573	0.403541908	0.36685628	1277/1278/3910	3
hsa04540	hsa04540	Gap junction	3/90	88/8105	0.074108573	0.403541908	0.36685628	1956/5159/2885	3
hsa05165	hsa05165	Human papillomavirus infection	7/90	331/8105	0.074337382	0.403541908	0.36685628	1956/5159/2885/537/1277/1278/3910	7
hsa05219	hsa05219	Bladder cancer	2/90	41/8105	0.075664108	0.403541908	0.36685628	1956/2261	2
hsa05224	hsa05224	Breast cancer	4/90	147/8105	0.080460802	0.416502973	0.378639066	1956/2260/2885/672	4
hsa04912	hsa04912	GnRH signaling pathway	3/90	93/8105	0.084310611	0.423961928	0.385419935	1956/2885/815	3
hsa04921	hsa04921	Oxytocin signaling pathway	4/90	154/8105	0.091726984	0.442964438	0.402694944	1956/4878/55799/815	4
hsa05231	hsa05231	Choline metabolism in cancer	3/90	98/8105	0.095080159	0.442964438	0.402694944	1956/5159/2885	3
hsa00514	hsa00514	Other types of O-glycan biosynthesis	2/90	47/8105	0.095640049	0.442964438	0.402694944	56913/8703	2
hsa05161	hsa05161	Hepatitis B	4/90	162/8105	0.105477282	0.45560244	0.414184037	2885/537/10971/7529	4
hsa00920	hsa00920	Sulfur metabolism	1/90	10/8105	0.105710817	0.45560244	0.414184037	54928	1
hsa04979	hsa04979	Cholesterol metabolism	2/90	50/8105	0.106134659	0.45560244	0.414184037	335/336	2
hsa05171	hsa05171	Coronavirus disease - COVID-19	5/90	232/8105	0.115191963	0.473372468	0.430338607	1956/2147/718/731/729	5
hsa00430	hsa00430	Taurine and hypotaurine metabolism	1/90	11/8105	0.115653501	0.473372468	0.430338607	2686	1
hsa04670	hsa04670	Leukocyte transendothelial migration	3/90	114/8105	0.132971638	0.518353575	0.471230522	7430/4478/4301	3
hsa00480	hsa00480	Glutathione metabolism	2/90	58/8105	0.135478775	0.518353575	0.471230522	2686/5226	2
hsa05213	hsa05213	Endometrial cancer	2/90	58/8105	0.135478775	0.518353575	0.471230522	1956/2885	2
hsa05152	hsa05152	Tuberculosis	4/90	180/8105	0.139572808	0.522655622	0.475141474	972/537/815/718	4
hsa00533	hsa00533	Glycosaminoglycan biosynthesis - keratan sulfate	1/90	14/8105	0.144830328	0.523541183	0.47594653	8703	1
hsa04722	hsa04722	Neurotrophin signaling pathway	3/90	119/8105	0.145758625	0.523541183	0.47594653	2885/4916/815	3
hsa04611	hsa04611	Platelet activation	3/90	124/8105	0.158934957	0.559451049	0.508591862	2147/1277/1278	3
hsa00910	hsa00910	Nitrogen metabolism	1/90	17/8105	0.173054884	0.584468806	0.531335278	762	1
hsa04114	hsa04114	Oocyte meiosis	3/90	131/8105	0.177968714	0.584468806	0.531335278	815/10971/7529	3
hsa05120	hsa05120	Epithelial cell signaling in Helicobacter pylori infection	2/90	70/8105	0.182254008	0.584468806	0.531335278	1956/537	2
hsa00511	hsa00511	Other glycan degradation	1/90	18/8105	0.182256796	0.584468806	0.531335278	23324	1
hsa05223	hsa05223	Non-small cell lung cancer	2/90	72/8105	0.190277977	0.584468806	0.531335278	1956/2885	2
hsa05203	hsa05203	Viral carcinogenesis	4/90	204/8105	0.190859048	0.584468806	0.531335278	2885/718/10971/7529	4
hsa05322	hsa05322	Systemic lupus erythematosus	3/90	136/8105	0.191935932	0.584468806	0.531335278	718/731/729	3
hsa04080	hsa04080	Neuroactive ligand-receptor interaction	6/90	350/8105	0.192609038	0.584468806	0.531335278	885/66004/133/3060/2147/718	6
hsa03320	hsa03320	PPAR signaling pathway	2/90	75/8105	0.202401764	0.603774755	0.548886141	335/336	2
hsa04971	hsa04971	Gastric acid secretion	2/90	76/8105	0.206463494	0.60562625	0.550569318	815/7430	2
hsa04550	hsa04550	Signaling pathways regulating pluripotency of stem cells	3/90	143/8105	0.211937379	0.609225131	0.553841028	2260/2261/2885	3
hsa04612	hsa04612	Antigen processing and presentation	2/90	78/8105	0.214613398	0.609225131	0.553841028	972/5641	2
hsa00515	hsa00515	Mannose type O-glycan biosynthesis	1/90	23/8105	0.226769169	0.618311006	0.562100914	8703	1
hsa04964	hsa04964	Proximal tubule bicarbonate reclamation	1/90	23/8105	0.226769169	0.618311006	0.562100914	762	1
hsa04662	hsa04662	B cell receptor signaling pathway	2/90	82/8105	0.231000092	0.618311006	0.562100914	2885/975	2
hsa00534	hsa00534	Glycosaminoglycan biosynthesis - heparan sulfate / heparin	1/90	24/8105	0.235379758	0.618311006	0.562100914	2135	1
hsa04977	hsa04977	Vitamin digestion and absorption	1/90	24/8105	0.235379758	0.618311006	0.562100914	335	1
hsa04911	hsa04911	Insulin secretion	2/90	86/8105	0.247468623	0.631224313	0.573840285	885/815	2
hsa05210	hsa05210	Colorectal cancer	2/90	86/8105	0.247468623	0.631224313	0.573840285	1956/2885	2
hsa04714	hsa04714	Thermogenesis	4/90	232/8105	0.256908286	0.645940834	0.58721894	4878/2260/2885/28958	4
hsa04630	hsa04630	JAK-STAT signaling pathway	3/90	162/8105	0.268187734	0.664803398	0.604366725	1956/5159/2885	3
hsa04310	hsa04310	Wnt signaling pathway	3/90	166/8105	0.280280558	0.678859416	0.617144924	27123/815/6424	3
hsa00030	hsa00030	Pentose phosphate pathway	1/90	30/8105	0.285087565	0.678859416	0.617144924	5226	1
hsa04530	hsa04530	Tight junction	3/90	169/8105	0.289386052	0.678859416	0.617144924	7430/4478/4301	3
hsa04141	hsa04141	Protein processing in endoplasmic reticulum	3/90	171/8105	0.295470148	0.678859416	0.617144924	5589/10960/258010	3
hsa01522	hsa01522	Endocrine resistance	2/90	98/8105	0.297000995	0.678859416	0.617144924	1956/2885	2
hsa04925	hsa04925	Aldosterone synthesis and secretion	2/90	98/8105	0.297000995	0.678859416	0.617144924	4878/815	2
hsa04640	hsa04640	Hematopoietic cell lineage	2/90	99/8105	0.301118554	0.679446994	0.617679086	966/4254	2
hsa04933	hsa04933	AGE-RAGE signaling pathway in diabetic complications	2/90	100/8105	0.305232409	0.680011443	0.618192221	1277/1278	2
hsa04916	hsa04916	Melanogenesis	2/90	101/8105	0.309342137	0.680552701	0.618684273	4254/815	2
hsa04972	hsa04972	Pancreatic secretion	2/90	102/8105	0.313447325	0.681070732	0.619155211	885/1361	2
hsa04928	hsa04928	Parathyroid hormone synthesis, secretion and action	2/90	106/8105	0.329814776	0.703146423	0.639224021	1956/2260	2
hsa00512	hsa00512	Mucin type O-glycan biosynthesis	1/90	36/8105	0.331597461	0.703146423	0.639224021	56913	1
hsa00513	hsa00513	Various types of N-glycan biosynthesis	1/90	39/8105	0.353717319	0.741122001	0.673747274	8703	1
hsa01200	hsa01200	Carbon metabolism	2/90	115/8105	0.366230763	0.753239308	0.684763008	2023/5226	2
hsa03440	hsa03440	Homologous recombination	1/90	41/8105	0.368060117	0.753239308	0.684763008	672	1
hsa04940	hsa04940	Type I diabetes mellitus	1/90	43/8105	0.382088067	0.755781983	0.68707453	5798	1
hsa04975	hsa04975	Fat digestion and absorption	1/90	43/8105	0.382088067	0.755781983	0.68707453	335	1
hsa04935	hsa04935	Growth hormone synthesis, secretion and action	2/90	119/8105	0.382185207	0.755781983	0.68707453	2885/3483	2
hsa04962	hsa04962	Vasopressin-regulated water reabsorption	1/90	44/8105	0.388986116	0.760025692	0.690932447	140735	1
hsa05415	hsa05415	Diabetic cardiomyopathy	3/90	203/8105	0.392967829	0.760025692	0.690932447	815/1277/1278	3
hsa04110	hsa04110	Cell cycle	2/90	126/8105	0.409692669	0.778358178	0.707598344	10971/7529	2
hsa04142	hsa04142	Lysosome	2/90	128/8105	0.417446068	0.778358178	0.707598344	537/5641	2
hsa00510	hsa00510	N-Glycan biosynthesis	1/90	50/8105	0.428803842	0.778358178	0.707598344	8703	1
hsa05110	hsa05110	Vibrio cholerae infection	1/90	50/8105	0.428803842	0.778358178	0.707598344	537	1
hsa05144	hsa05144	Malaria	1/90	50/8105	0.428803842	0.778358178	0.707598344	975	1
hsa04068	hsa04068	FoxO signaling pathway	2/90	131/8105	0.428981496	0.778358178	0.707598344	1956/2885	2
hsa04270	hsa04270	Vascular smooth muscle contraction	2/90	134/8105	0.44039871	0.783490779	0.712264345	4878/133	2
hsa04024	hsa04024	cAMP signaling pathway	3/90	219/8105	0.440713563	0.783490779	0.712264345	4878/815/4301	3
hsa03460	hsa03460	Fanconi anemia pathway	1/90	54/8105	0.453912089	0.792262183	0.720238348	672	1
hsa04915	hsa04915	Estrogen signaling pathway	2/90	138/8105	0.455429594	0.792262183	0.720238348	1956/2885	2
hsa05162	hsa05162	Measles	2/90	139/8105	0.459151947	0.792262183	0.720238348	4179/4478	2
hsa04923	hsa04923	Regulation of lipolysis in adipocytes	1/90	56/8105	0.466053742	0.796363676	0.723966978	4878	1
hsa05134	hsa05134	Legionellosis	1/90	57/8105	0.472024069	0.798809963	0.726190876	718	1
hsa05416	hsa05416	Viral myocarditis	1/90	60/8105	0.489541788	0.808036725	0.734578841	1525	1
hsa05226	hsa05226	Gastric cancer	2/90	149/8105	0.4955594	0.808036725	0.734578841	1956/2885	2
hsa04261	hsa04261	Adrenergic signaling in cardiomyocytes	2/90	150/8105	0.499115907	0.808036725	0.734578841	55799/815	2
hsa04145	hsa04145	Phagosome	2/90	152/8105	0.506181615	0.808036725	0.734578841	537/718	2
hsa04934	hsa04934	Cushing syndrome	2/90	155/8105	0.516660593	0.808036725	0.734578841	1956/815	2
hsa04390	hsa04390	Hippo signaling pathway	2/90	157/8105	0.523565916	0.808036725	0.734578841	10971/7529	2
hsa00010	hsa00010	Glycolysis / Gluconeogenesis	1/90	67/8105	0.52821263	0.808036725	0.734578841	2023	1
hsa04720	hsa04720	Long-term potentiation	1/90	67/8105	0.52821263	0.808036725	0.734578841	815	1
hsa05221	hsa05221	Acute myeloid leukemia	1/90	67/8105	0.52821263	0.808036725	0.734578841	2885	1
hsa04664	hsa04664	Fc epsilon RI signaling pathway	1/90	68/8105	0.533495146	0.808036725	0.734578841	2885	1
hsa04924	hsa04924	Renin secretion	1/90	69/8105	0.538719164	0.808036725	0.734578841	4878	1
hsa05031	hsa05031	Amphetamine addiction	1/90	69/8105	0.538719164	0.808036725	0.734578841	815	1
hsa05211	hsa05211	Renal cell carcinoma	1/90	69/8105	0.538719164	0.808036725	0.734578841	2885	1
hsa04917	hsa04917	Prolactin signaling pathway	1/90	70/8105	0.543885326	0.808036725	0.734578841	2885	1
hsa01524	hsa01524	Platinum drug resistance	1/90	73/8105	0.559042972	0.808036725	0.734578841	672	1
hsa05225	hsa05225	Hepatocellular carcinoma	2/90	168/8105	0.560367093	0.808036725	0.734578841	1956/2885	2
hsa01230	hsa01230	Biosynthesis of amino acids	1/90	75/8105	0.568870221	0.808036725	0.734578841	2023	1
hsa04918	hsa04918	Thyroid hormone synthesis	1/90	75/8105	0.568870221	0.808036725	0.734578841	433	1
hsa05212	hsa05212	Pancreatic cancer	1/90	76/8105	0.57370231	0.808036725	0.734578841	1956	1
hsa05220	hsa05220	Chronic myeloid leukemia	1/90	76/8105	0.57370231	0.808036725	0.734578841	2885	1
hsa05140	hsa05140	Leishmaniasis	1/90	77/8105	0.578480837	0.808036725	0.734578841	718	1
hsa05412	hsa05412	Arrhythmogenic right ventricular cardiomyopathy	1/90	77/8105	0.578480837	0.808036725	0.734578841	55799	1
hsa04721	hsa04721	Synaptic vesicle cycle	1/90	78/8105	0.583206388	0.808223026	0.734748206	10814	1
hsa03018	hsa03018	RNA degradation	1/90	79/8105	0.587879544	0.808334374	0.734849431	2023	1
hsa04260	hsa04260	Cardiac muscle contraction	1/90	87/8105	0.623446223	0.83907067	0.762791518	55799	1
hsa05235	hsa05235	PD-L1 expression and PD-1 checkpoint pathway in cancer	1/90	89/8105	0.63185274	0.83907067	0.762791518	1956	1
hsa05410	hsa05410	Hypertrophic cardiomyopathy	1/90	90/8105	0.63598613	0.83907067	0.762791518	55799	1
hsa05222	hsa05222	Small cell lung cancer	1/90	92/8105	0.64411572	0.83907067	0.762791518	3910	1
hsa05130	hsa05130	Pathogenic Escherichia coli infection	2/90	197/8105	0.647577047	0.83907067	0.762791518	2147/7430	2
hsa05323	hsa05323	Rheumatoid arthritis	1/90	93/8105	0.648112923	0.83907067	0.762791518	537	1
hsa05150	hsa05150	Staphylococcus aureus infection	1/90	96/8105	0.659840063	0.83907067	0.762791518	718	1
hsa05414	hsa05414	Dilated cardiomyopathy	1/90	96/8105	0.659840063	0.83907067	0.762791518	55799	1
hsa04070	hsa04070	Phosphatidylinositol signaling system	1/90	97/8105	0.663662562	0.83907067	0.762791518	54928	1
hsa04666	hsa04666	Fc gamma R-mediated phagocytosis	1/90	97/8105	0.663662562	0.83907067	0.762791518	1072	1
hsa04713	hsa04713	Circadian entrainment	1/90	97/8105	0.663662562	0.83907067	0.762791518	815	1
hsa04750	hsa04750	Inflammatory mediator regulation of TRP channels	1/90	98/8105	0.667442578	0.83907067	0.762791518	815	1
hsa05142	hsa05142	Chagas disease	1/90	102/8105	0.682147077	0.848315484	0.771195894	718	1
hsa05207	hsa05207	Chemical carcinogenesis - receptor activation	2/90	212/8105	0.687113564	0.848315484	0.771195894	1956/2885	2
hsa04660	hsa04660	T cell receptor signaling pathway	1/90	104/8105	0.68925633	0.848315484	0.771195894	2885	1
hsa05417	hsa05417	Lipid and atherosclerosis	2/90	215/8105	0.694576626	0.848926987	0.771751807	815/335	2
hsa04922	hsa04922	Glucagon signaling pathway	1/90	107/8105	0.699626386	0.849201683	0.77200153	815	1
hsa05208	hsa05208	Chemical carcinogenesis - reactive oxygen species	2/90	223/8105	0.713771471	0.849702759	0.772457053	1956/2885	2
hsa05145	hsa05145	Toxoplasmosis	1/90	112/8105	0.716154573	0.849702759	0.772457053	3910	1
hsa05163	hsa05163	Human cytomegalovirus infection	2/90	225/8105	0.718411831	0.849702759	0.772457053	1956/2885	2
hsa04725	hsa04725	Cholinergic synapse	1/90	113/8105	0.719350631	0.849702759	0.772457053	815	1
hsa04380	hsa04380	Osteoclast differentiation	1/90	128/8105	0.763232408	0.884337217	0.803942925	2885	1
hsa05131	hsa05131	Shigellosis	2/90	247/8105	0.76543906	0.884337217	0.803942925	1956/718	2
hsa04650	hsa04650	Natural killer cell mediated cytotoxicity	1/90	131/8105	0.77115726	0.884337217	0.803942925	2885	1
hsa04728	hsa04728	Dopaminergic synapse	1/90	132/8105	0.773740135	0.884337217	0.803942925	815	1
hsa04144	hsa04144	Endocytosis	2/90	252/8105	0.775141256	0.884337217	0.803942925	1956/2261	2
hsa00190	hsa00190	Oxidative phosphorylation	1/90	134/8105	0.778819709	0.884337217	0.803942925	537	1
hsa04910	hsa04910	Insulin signaling pathway	1/90	137/8105	0.786228348	0.887026854	0.806388049	2885	1
hsa04120	hsa04120	Ubiquitin mediated proteolysis	1/90	142/8105	0.798034523	0.888949848	0.808136226	672	1
hsa04936	hsa04936	Alcoholic liver disease	1/90	142/8105	0.798034523	0.888949848	0.808136226	718	1
hsa05168	hsa05168	Herpes simplex virus 1 infection	4/90	495/8105	0.808338081	0.893417664	0.812197876	972/718/5199/5818	4
hsa05020	hsa05020	Prion disease	2/90	273/8105	0.812197876	0.893417664	0.812197876	731/729	2
hsa04150	hsa04150	mTOR signaling pathway	1/90	155/8105	0.825797484	0.902735138	0.820668307	2885	1
hsa04217	hsa04217	Necroptosis	1/90	159/8105	0.833554392	0.905589957	0.823263598	815	1
hsa04022	hsa04022	cGMP-PKG signaling pathway	1/90	167/8105	0.848057906	0.915694426	0.832449478	4878	1
hsa05034	hsa05034	Alcoholism	1/90	187/8105	0.879074832	0.930681476	0.846074069	2885	1
hsa04613	hsa04613	Neutrophil extracellular trap formation	1/90	190/8105	0.88315214	0.930681476	0.846074069	718	1
hsa04062	hsa04062	Chemokine signaling pathway	1/90	192/8105	0.885794509	0.930681476	0.846074069	2885	1
hsa05202	hsa05202	Transcriptional misregulation in cancer	1/90	192/8105	0.885794509	0.930681476	0.846074069	6692	1
hsa05167	hsa05167	Kaposi sarcoma-associated herpesvirus infection	1/90	194/8105	0.888377773	0.930681476	0.846074069	718	1
hsa05169	hsa05169	Epstein-Barr virus infection	1/90	202/8105	0.898145506	0.935346799	0.850315272	7431	1
hsa05170	hsa05170	Human immunodeficiency virus 1 infection	1/90	212/8105	0.909174016	0.941262511	0.855693192	1072	1
hsa05132	hsa05132	Salmonella infection	1/90	249/8105	0.940638102	0.96814214	0.880129218	140735	1
hsa05012	hsa05012	Parkinson disease	1/90	266/8105	0.95120773	0.97332884	0.8848444	815	1
hsa05022	hsa05022	Pathways of neurodegeneration - multiple diseases	2/90	476/8105	0.972093322	0.988950432	0.899045847	27123/815	2
hsa05014	hsa05014	Amyotrophic lateral sclerosis	1/90	364/8105	0.984375844	0.993281505	0.902983186	283	1
hsa05010	hsa05010	Alzheimer disease	1/90	384/8105	0.98763786	0.993281505	0.902983186	27123	1
hsa04740	hsa04740	Olfactory transduction	1/90	441/8105	0.993679084	0.993679084	0.903344622	815	1
